# Supplementary material for: OAS1 and OAS3 negatively regulate the expression of chemokines and interferon-responsive genes in human macrophages
Source: PubMed Central journal article supplement — BMB Rep. 2019 Feb 28;52(2):133–8. doi: 10.5483/BMBRep.2019.52.2.129 (PMC6443328; doi:10.5483/bmbrep.2019.52.2.129), 2019-02-28
Supplement: bmb-52-133-supple.pdf [file bmb-52-133-supple.pdf]

# **OAS1 and OAS3 negatively regulate the expression of chemokines and interferon-responsive genes in human macrophages**

*Wook-Bin Lee<sup>1</sup>, Won Young Choi<sup>2</sup>, Dong-Hyun Lee<sup>2</sup>, Hyeran Shim<sup>3,4</sup>, Jeongsil Kim-Ha<sup>3</sup>, and Young-Joon Kim<sup>2,4</sup>*

<sup>1</sup>Korea Institute of Science and Technology (KIST) Gangneung Institute of Natural Products, Gangneung, Republic of Korea. <sup>2</sup>Department of Integrated Omics for Biomedical Science, Graduate School, Yonsei University, Seoul, Republic of Korea. <sup>3</sup>Department of Integrative Bioscience and Biotechnology, College of Life Sciences, Sejong University, Seoul 05006, Republic of Korea. <sup>4</sup>Department of Biochemistry, College of Life Science and Biotechnology, Yonsei University, Seoul 03722, Republic of Korea.

## **SUPPLEMENTARY INFORMATION**

### **SUPPLEMENTARY METHODS**

#### **rRNA cleavage assay**

Cells were transfected with 1 µg/ml poly(I:C) (Invivogen) using Lipofectamine 2000 (Life Technologies/ThermoFisher Scientific) according to the manufacturer's protocol. The cells were harvested 6 h after transfection and lysed with TRIzol to isolate RNA for analysis by Bioanalyzer (Agilent Technologies) and agarose gel electrophoresis.

#### **Immunoblotting**

For immunoblot analyses, cells were lysed for 15 min at 4°C in radioimmunoprecipitation assay (RIPA) lysis buffer [100 mM Tris-HCl (pH 8.0), 50 mM NaCl, 5 mM EDTA, 0.5% NP-40, 1% Triton X-100, 50 mM β-glycerophosphate, 50 mM NaF, 0.1 mM Na<sub>3</sub>VO<sub>4</sub>, and 0.5% sodium deoxycholate] with protease inhibitor cocktail (Roche).

Lysates were centrifuged at  $1,300 \times g$  for 15 min at 4°C to remove nuclei. Then, proteins were separated by SDS-PAGE and transferred to nitrocellulose membranes. The membranes were developed with Amersham enhanced chemiluminescence (ECL) reagents, followed by detection of the signal using the ImageQuant LAS 4000 system (GE Healthcare). The anti-OAS1 (HPA003657) and anti-OAS3 (HPA041253) antibodies were obtained from Atlas Antibodies, and the anti-RNaseL (#27281) and anti-GAPDH antibodies (#5174) were purchased from Cell Signaling Technology. All antibodies were used at a 1:1,000 dilution for immunoblot analysis.

### **mRNA sequencing and data analysis**

RNA from cell lysates was purified using the RNeasy mini kit (Qiagen) with DNase digestion, and converted to cDNA according to the Illumina TruSeq Stranded mRNA Sample Preparation Guide. mRNA-seq was performed on the Illumina HiSeq 2500 platform at Macrogen in Korea. The Tuxedo tools were used for processing RNA-seq data, as described in Trapnell et al. {Trapnell, 2012 #118}. The RNA-seq data were mapped to the genome (mm10) using TopHat (version 2.0.10), which includes Bowtie as a short-read aligner. Mapped reads (alignments) were assembled on the genome by Cufflinks (version 2.1.1). Cufflinks calculates the relative abundance of transcripts. When assembling transcripts, the NCBI mRNA reference sequence collection (RefSeq) was used. Subsequently, the sample set was normalized using Cuffnorm (version 2.2.1) to minimize inter-sample variation and to compare fragments per kilobase of transcript per million mapped reads of all samples from different experimental conditions. The GEO accession number for the RNA sequencing data reported in this paper is GSE113363. Furthermore, innateDB ([www.innatedb.com](http://www.innatedb.com)) was used for gene ontology analysis. The gene lists used in ontology analysis were annotated by RefSeq ID. Hypergeometric analysis was selected as the ontology analysis algorithm, and the Benjamini–Hochberg method

with P-value correction was used for statistical analysis.

### **mRNA quantification by quantitative RT-PCR**

Total RNA was extracted with TRIzol Reagent (Invitrogen/ThermoFisher Scientific) according to the manufacturer's protocol. cDNA was synthesized using Superscript II Reverse Transcriptase (Invitrogen/ThermoFisher Scientific) with oligo-dT primers. The expression of individual genes was measured by real-time PCR using a Bio-Rad CFX, and quantitatively normalized to the expression of the housekeeping gene *GAPDH* by the change-in-cycling-threshold ( $\Delta\Delta C_T$ ) method. Primers used are listed in **Supplementary Table 2**.

### **ELISAs**

CCL2, CCL8, and CXCL10 secretion in culture supernatants was measured using enzyme-linked immunosorbent assay (ELISA) kits (Biolegend).

### **SUPPLEMENTARY FIGURE LEGENDS**

**Supplementary Figure 1. The expression of ISG15 and CXCL10 is increased in OAS1<sup>-/-</sup> THP-1 cells treated extracellularly with poly(I:C).** WT, OAS1<sup>-/-</sup>, and OAS3<sup>-/-</sup> dTHP-1 cells were cultured for 16 h in the absence or presence of poly(I:C) (10  $\mu$ g/ml), and the mRNA levels of (A) ISG15 and (B) CXCL10 were quantified by qRT-PCR.

**Supplementary Figure 2. The induction of IFN- $\beta$  in response to intracellular poly(I:C) is no significant differences in WT, OAS1<sup>-/-</sup>, and OAS3<sup>-/-</sup> dTHP-1 cells.** WT, OAS1<sup>-/-</sup>, and OAS3<sup>-/-</sup> dTHP-1 cells were transfected with 1  $\mu$ g/ml poly(I:C) for 6 h, and the mRNA levels of IFN- $\beta$  were quantified by qRT-PCR.

**Supplementary Figure 3. OAS3 is not required for type I interferon-induced chemokine expression in THP-1 cells.** (A) WT, OAS1<sup>-/-</sup>, and OAS3<sup>-/-</sup> dTHP-1 cells were treated with the indicated doses of (A-C) IFN- $\alpha$  or (D-F) IFN- $\beta$  for 16 h, and production of (A, D) CCL2, (B, E) CCL8, and (C, F) CXCL10 was measured by ELISA.

# Supplementary Figure 1

**A**

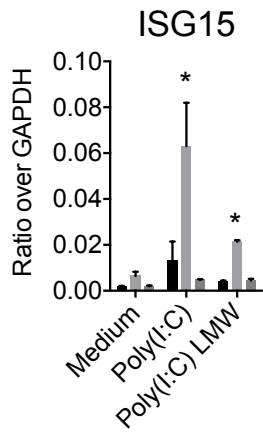

**B**

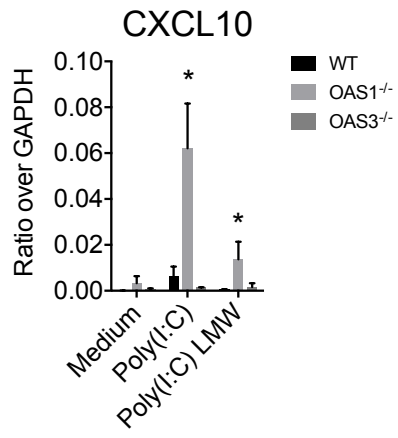

# Supplementary Figure 2

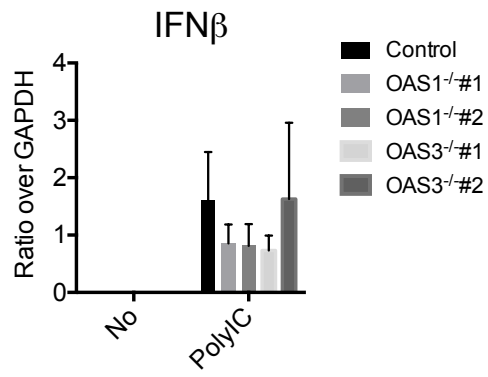

# Supplementary Figure 3

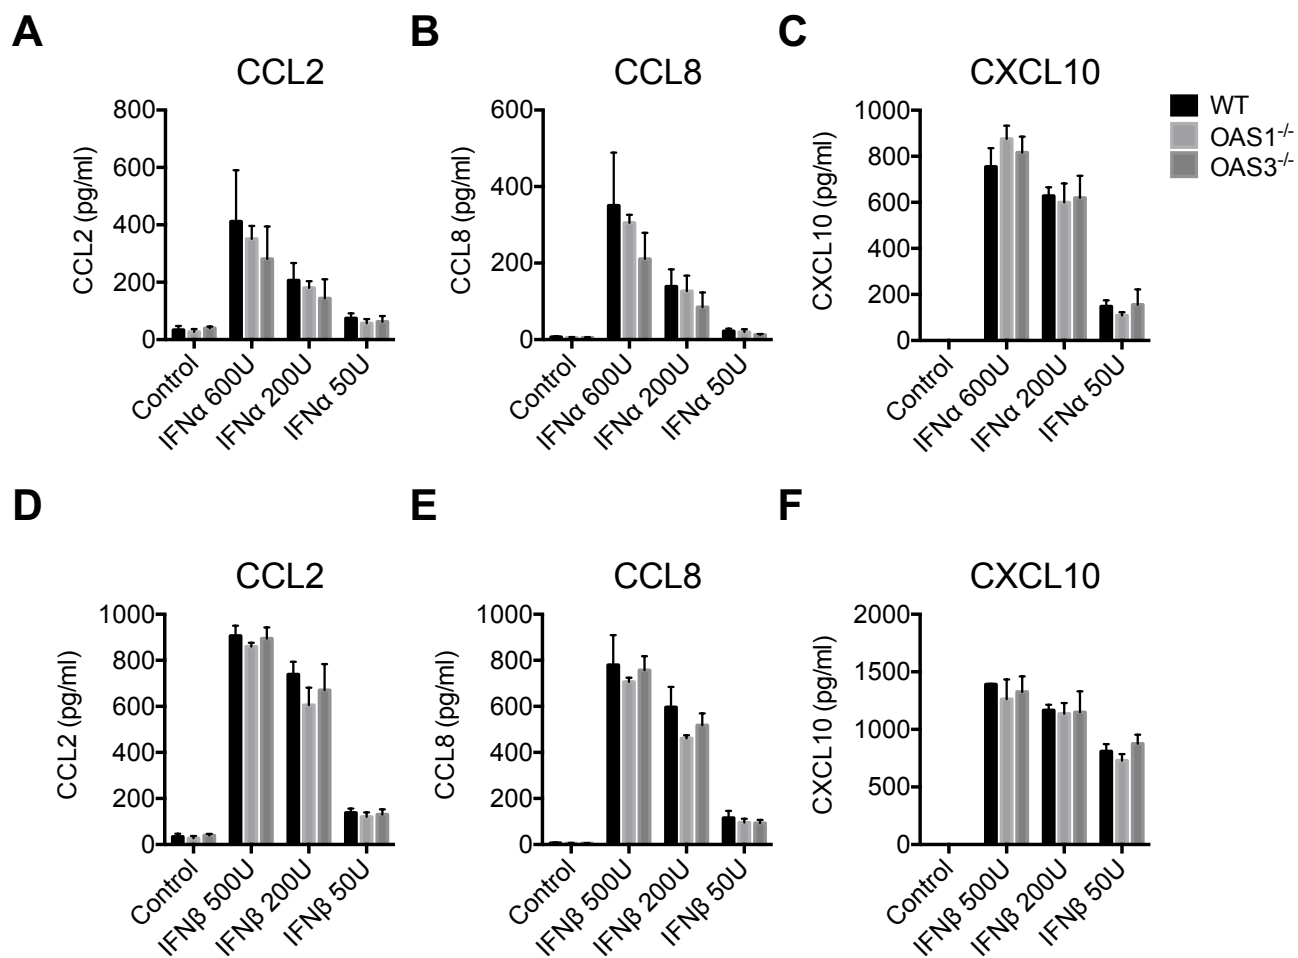

# Supplementary Table 1

## Gene ontology analysis from mRNA sequencing

### 4 fold increased by intracellular Poly(I:C) in OAS3<sup>-/-</sup> cells

| GO Term ID | GO Term Name                        | Proportion | GO Term ORA P-Value |
|------------|-------------------------------------|------------|---------------------|
| GO:0060337 | type I interferon signaling pathway | 30%        | <1.0E-5             |
| GO:0051607 | defense response to virus           | 16%        | <1.0E-5             |
| GO:0008009 | chemokine activity                  | 24%        | <1.0E-5             |
| GO:0019221 | cytokine-mediated signaling pathway | 10%        | <1.0E-5             |
| GO:0006935 | chemotaxis                          | 10%        | <1.0E-5             |

### 4 fold decreased by intracellular Poly(I:C) in OAS3<sup>-/-</sup> cells

| GO Term ID | GO Term Name                                                                           | Proportion | GO Term ORA P-Value |
|------------|----------------------------------------------------------------------------------------|------------|---------------------|
| GO:0071560 | cellular response to transforming growth factor beta stimulus                          | 8%         | 0.00037             |
| GO:0006998 | nuclear envelope organization                                                          | 18%        | 0.00068             |
| GO:1902230 | negative regulation of intrinsic apoptotic signaling pathway in response to DNA damage | 14%        | 0.00112             |
| GO:0043488 | regulation of mRNA stability                                                           | 14%        | 0.00112             |
| GO:0045333 | cellular respiration                                                                   | 11%        | 0.00187             |



# Supplementary Table 2

## Primers for qRT-PCR

| Gene   | Sequence(Forward) 5'-3' | Sequence(Reverse) 5'-3' | GeneBank_ID |
|--------|-------------------------|-------------------------|-------------|
| TNFa   | GGAGAAGGGTGACCGACTCA    | CTGCCCAGACTCGGCAA       | NM_000594   |
| IL-1b  | TTTGAGTCTGCCCAGTTCCC    | TCAGTTATATCCTGGCCGCC    | NM_000576   |
| CCL2   | CCTTCATTCCCAAGGGCTC     | GGTTTGCTTGTCCAGGTGGT    | NM_002982   |
| CCL5   | TCCAACCCAGCAGTCGTCT     | TTGGCGGTTCTTTCGGGTG     | NM_002985   |
| CCL8   | GTTTCTGCAGCGCTTCTGTG    | ATCTCTCCTTGGGGTCAGCA    | NM_005623   |
| CXCL9  | CAATTTGCCCAAGCCCTTC     | TCACATCTGCTGAATCTGGGT   | NM_002416   |
| CXCL10 | TGGCATTCAAGGAGTACCTC    | TTGTAGCAATGATCTCAACACG  | NM_001565   |
| ISG15  | AGGCAGCGAACTCATCTTTG    | CCAGCATCTTCACCGTCAG     | NM_005101   |
| OASL   | AAAAGAGAGGCCCATCATCCTG  | AAGGGTTCACGATGAGGTTGAA  | NM_003733   |
| GBP1   | CTTTGTTCAGAAGCTACAAGACC | CTTTCTTTGCATTTCTGCAAC   | NM_002053   |
| GBP3   | ACTGGTGGCGAATCCAGAAG    | ACTGTGGAGCCCAGAGAGAA    | NM_018284   |
| GBP4   | GGTGGCCATTGTAGGGCTAT    | AGAAGGACCAGGGTGTGGTT    | NM_052941   |
| GBP5   | CCGCTGCATACAAATCAGGC    | AGGTTGCGTAATGGCAGACA    | NM_052942   |
| IFIT1  | CTGCAGAACGGCTGCCTAAT    | GGCTTCCTCATTCTGGCCTT    | NM_001548   |
| IFNb   | AGGACAGGATGAACTTTGAC    | TGATAGACATTAGCCAGGAG    | NM_002176   |
| GAPDH  | CCATGTTTCGTCATGGGTGTG   | GGTGCTAAGCAGTTGGTGGTG   | NM_002046   |

## CRISPR-Cas9 gRNA

| Gene   | gRNA #     | Sequence(Forward) 5'-3'   | Sequence(Reverse) 5'-3'      |
|--------|------------|---------------------------|------------------------------|
| hOAS1  | guide RNA1 | CACCGCCAAGACCGTCCGAAATCCC | AAACGGGATTTCCGGACGGTCTTGGC   |
|        | guide RNA2 | CACCGTCAGTACGAAGCTGAGCGCA | AAACTGCGCTCAGCTTCGTACTIONGAC |
| hOAS3  | guide RNA1 | CACCGAATTGCTGACCATCTTCGCC | AAACGGCGAAGATGGTCAGCAATTC    |
|        | guide RNA2 | CACCGCGAAGATGGTCAGCAATTC  | AAACGGAATTGCTGACCATCTTCGC    |
| RNaseL | guide RNA1 | CACCGGCAGGTGGCATTACCGTCA  | AAACTGACGGTAAATGCCACCTGCC    |
